# Supplementary material
Source: publisher figshare collection journal article supplement (https://acs.figshare.com/ndownloader/files/3788464)
Supplement: Supplementary file 1 [file 3788464]

# Supporting Information

## **Installing logic-gates to Multiresponsive Supramolecular Hydrogel System Co-assembled from Phenylalanine Amphiphile and Bis(pyridinyl) Derivative**

By Guo-Feng Liu, Wei Ji, and Chuan-Liang Feng \*

[\*] Corresponding author: Prof. Dr. C. L. Feng, Fax: +86 2154747651;

E-mail: [clfeng@sjtu.edu.cn](mailto:clfeng@sjtu.edu.cn)

## Synthesis of AP

### 4, 4'-azopyridine (AP)

A solution of 4-aminopyridine (5.0 g) was dissolved in 100 ml of water. The solution was cooled and then added drop wise to 300 ml of a 10% NaOCl solution at 0 °C. The mixture was stirred at 0 °C for 30 minutes. The orange precipitate was filtered. The crude solid was dissolved in CH<sub>2</sub>Cl<sub>2</sub>. Black solid was removed via filtration was collected and the solvent was removed via rotary evaporation. The orange solid was then recrystallized from water to yield 3.20 g orange needles (**AP** in 65.4% yield). <sup>1</sup>H NMR (400 MHz, DMSO-d<sub>6</sub>, δ, ppm): δ = 7.82 (dd, J = 4.0, 8.0 Hz, 4H), 8.90 (dd, J = 4.0, 8.0 Hz, 4H). EI-MS for C<sub>10</sub>H<sub>8</sub>N<sub>4</sub> calcd. 184.20; found 184.20 [M<sup>+</sup>].

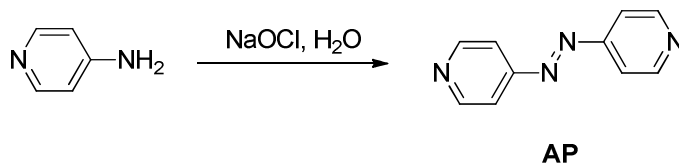

Scheme S1. Synthetic route of **AP**.

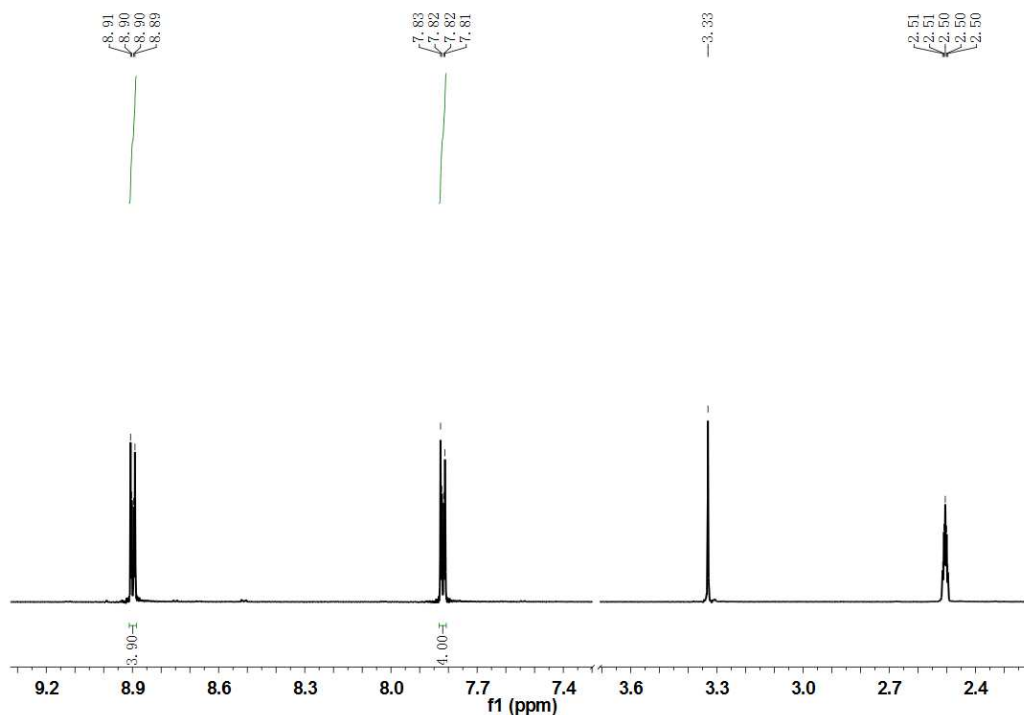

Figure S1. <sup>1</sup>H NMR spectra of AP in DMSO-d<sub>6</sub>.

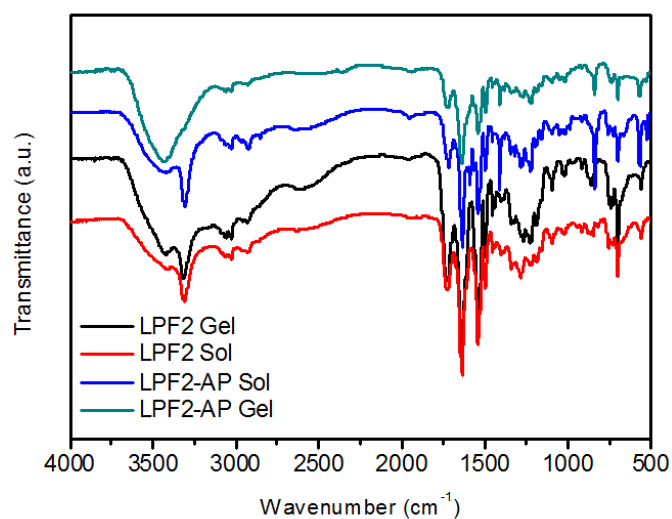

**Figure S2.** FT-IR curves of LPF2-AP xerogel, LPF2 xerogel, LPF2-AP ethanol solution, and LPF2 ethanol solution.

**Table S1.** FT-IR absorption value of COOH moieties in various xerogels and ethanol solution.

|             | Wavenumbers (nm <sup>-1</sup> ) |
|-------------|---------------------------------|
| LPF2-AP gel | 3431.81                         |
| LPF2 gel    | 3421.10, 3315.21                |
| LPF2-AP Sol | 3425.98, 3306.33                |
| LPF2 Sol    | 3310.79                         |

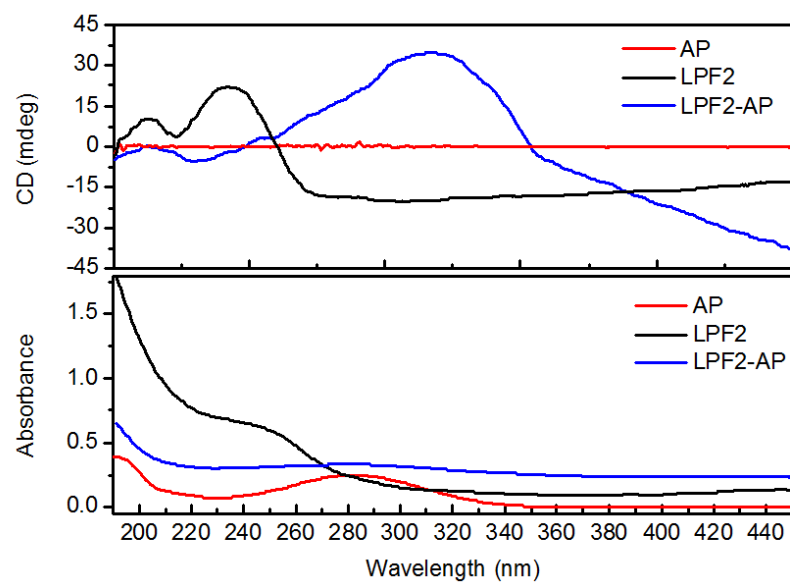

**Figure S3.** CD and UV-visible absorption spectra of AP solution, LPF2 hydrogel and LPF2-AP hydrogel (total gelators concentration = 0.20 wt %).

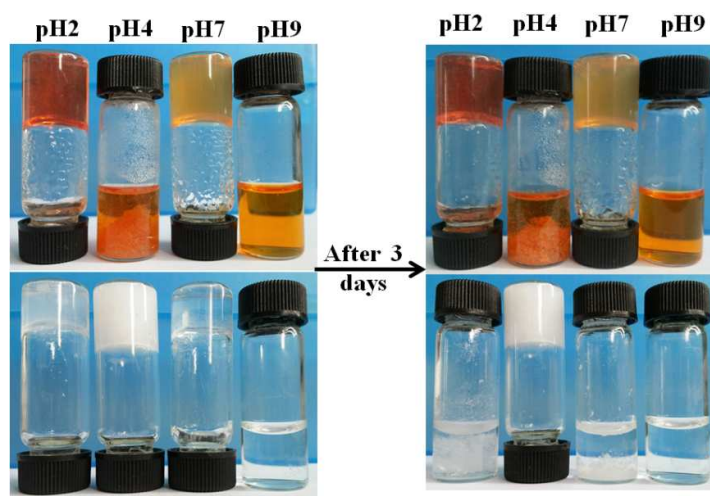

**Figure S4.** Optical pictures of LPF2-AP hydrogel and LPF2 hydrogel (total gelators concentration = 0.20 wt %) at different pH, respectively.

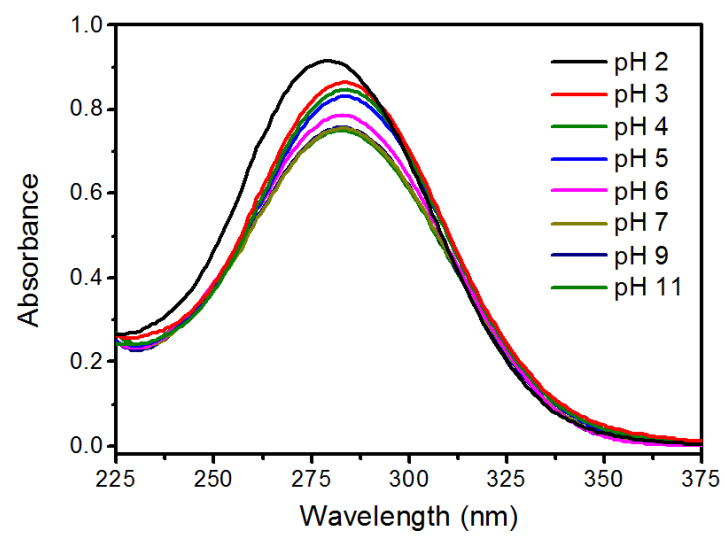

**Figure S5.** UV spectra of hydrogels LPF2-AP at different pH values.
